# Supplementary material for: Experimental study on the motion characteristics and critical hydraulic parameters of microplastics in a freshwater environment
Source: Royal Society of Chemistry journal article supplement (doi:10.1039/d4em00574k), 2024-12-13
Supplement: d4em00574k1.xlsx [file d4em00574k1.xlsx]

## Sheet: Critical start
Data Availability Statement The data supporting this article have been included as part of the Supplementary Information.
		A	B	C	ESD	CSF	Velocity	h	Roughness factor	（ESD*g*（ρs-ρ0）/ρ0）^0.5	ds/h	This text				Meyer-Piedt				Goncharov				Zhang				Sha
PS	Acrylic sheet	3	3	2.7	2.89647	0.3	0.0384615	6.5	0.014	0.0376732	0.044561	0.0220115	-0.4277	0.182928	0.0587464	0.654764	16.0239	256.764	1.5155	0.0916686	1.38338	1.91375	0.142275	0.0840508	1.18532	1.40498	0.11527	0.0986293	1.56436	2.44723	0.167264
	Acrylic sheet	3	1.5	1.1	1.70426	0.244444	0.038373	6.5	0.014	0.0288979	0.0262193	0.0254937	-0.335635	0.112651	0.0315394	0.548665	13.2982	176.842	1.33468	0.0773715	1.0163	1.03287	0.0927539	0.0762493	0.987056	0.974279	0.0889292	0.081035	1.11177	1.23604	0.105396
	Acrylic sheet	3	1.5	1.3	1.80185	0.288889	0.0357143	7	0.014	0.0297137	0.0257407	0.0252596	-0.292732	0.0856918	0.0226249	0.56589	14.8449	220.372	1.43974	0.079808	1.23462	1.52429	0.121944	0.0775796	1.17223	1.37412	0.113505	0.0839496	1.35059	1.82409	0.137772
	Acrylic sheet	2.8	1.9	1.5	1.99833	0.281955	0.0603632	13	0.014	0.0312919	0.0153718	0.03771	-0.375282	0.140837	0.041745	0.649416	9.75846	95.2276	1.06451	0.0914732	0.515379	0.265616	0.032588	0.0859481	0.423848	0.179647	0.023551	0.0987155	0.635357	0.403678	0.0456303
	Acrylic sheet	3	2	1.1	1.87578	0.183333	0.0581276	13.5	0.014	0.0303172	0.0138946	0.0443558	-0.236923	0.0561326	0.0137902	0.639871	10.008	100.161	1.08516	0.0900339	0.548902	0.301293	0.0361091	0.0855905	0.472459	0.223218	0.0282385	0.0971647	0.671576	0.451015	0.0497853
	Acrylic sheet	2	1.5	1.2	1.53262	0.4	0.0581276	13.5	0.014	0.0274041	0.0113527	0.0364168	-0.373502	0.139504	0.0412417	0.598196	9.29109	86.3243	1.02508	0.0839317	0.443922	0.197067	0.0254542	0.0836808	0.439605	0.193253	0.025041	0.0902027	0.551806	0.304489	0.0364189
	Acrylic sheet	1.8	1.9	1	1.50664	0.292398	0.0581276	13.5	0.014	0.0271708	0.0111603	0.0400551	-0.310911	0.0966657	0.0261549	0.594796	9.2326	85.2409	1.02007	0.0834311	0.43531	0.189495	0.024632	0.0835699	0.437698	0.19158	0.0248591	0.0896391	0.542111	0.293884	0.0353874
	Acrylic sheet	2.2	2	0.8	1.52118	0.181818	0.0654686	26.2	0.014	0.0273016	0.00580603	0.0714117	0.0907771	0.00824048	0.00142401	0.666429	9.17936	84.2606	1.0155	0.0920458	0.405953	0.164797	0.0218953	0.0919548	0.404564	0.163672	0.0217685	0.102712	0.568871	0.323614	0.0382543
	Acrylic sheet	2.5	2.2	0.8	1.63864	0.145455	0.0657195	26.1	0.014	0.0283361	0.00627832	0.0751607	0.143661	0.0206384	0.00339856	0.682723	9.38845	88.1429	1.03338	0.0945133	0.438133	0.19196	0.0249005	0.0925044	0.407565	0.166109	0.0220428	0.105474	0.604916	0.365923	0.0422107
	Acrylic sheet	2.5	1.3	0.8	1.37507	0.246154	0.0656943	26.1	0.014	0.0259573	0.00526846	0.0662222	0.00803625	6.45813e-05	1.20836e-05	0.643959	8.80235	77.4814	0.982736	0.0886746	0.349807	0.122365	0.0169707	0.0913611	0.390701	0.152648	0.020516	0.0989114	0.505631	0.255663	0.0315839
PA	Acrylic sheet	3.1	2.8	2.5	2.78924	0.288018	0.0615331	15.8	0.014	0.0618615	0.0176534	0.067588	0.0984008	0.00968271	0.00166145	0.749747	11.1845	125.092	1.17898	0.176894	1.87478	3.51478	0.210318	0.150296	1.44253	2.0809	0.15042	0.194374	2.15885	4.66062	0.249529
	Acrylic sheet	3	1.9	1.8	2.17295	0.315789	0.0635823	15.4	0.014	0.0546011	0.01411	0.0673547	0.0593317	0.00352025	0.000626599	0.686931	9.80381	96.1147	1.06828	0.161764	1.54417	2.38446	0.164468	0.138995	1.18607	1.40677	0.115372	0.176256	1.7721	3.14034	0.19608
	Acrylic sheet	3	1.8	1.5	2.0083	0.277778	0.0644189	15.2	0.014	0.0524918	0.0132125	0.0702447	0.0904366	0.00817878	0.00141379	0.667667	9.36446	87.6931	1.03134	0.157103	1.43877	2.07007	0.149902	0.135703	1.10657	1.2245	0.104701	0.170743	1.65051	2.7242	0.179208
	Acrylic sheet	3	1.4	1.4	1.80492	0.333333	0.0644189	15.2	0.014	0.049763	0.0118745	0.067735	0.0514779	0.00264997	0.000475246	0.644323	9.00208	81.0374	1.00018	0.151382	1.34996	1.8224	0.137686	0.131866	1.04701	1.09622	0.0967952	0.164142	1.54804	2.39644	0.165004
	Acrylic sheet	3	1.8	1.1	1.81104	0.203704	0.0907513	26.4	0.014	0.0498473	0.00686001	0.112883	0.243875	0.0594748	0.0089826	0.707218	6.79293	46.1439	0.79513	0.164229	0.809663	0.655554	0.0663566	0.142678	0.572187	0.327398	0.0386139	0.183533	1.02237	1.04525	0.0935512
	Acrylic sheet	3	0.8	0.8	1.24289	0.333333	0.0910143	26.4	0.014	0.0412947	0.00470793	0.103797	0.140446	0.0197251	0.00325753	0.623814	5.85402	34.2695	0.698805	0.143208	0.573466	0.328863	0.0387528	0.130994	0.439267	0.192956	0.0250087	0.159897	0.756835	0.572799	0.0598933
	Acrylic sheet	3	1.8	1.1	1.81104	0.203704	0.0983915	24.3	0.014	0.0498473	0.00745285	0.106847	0.0859384	0.0073854	0.00128201	0.697515	6.08918	37.0781	0.723514	0.162327	0.649809	0.422251	0.0472773	0.141015	0.433205	0.187666	0.0244323	0.180515	0.834665	0.696666	0.0694622
	Acrylic sheet	2.5	2.2	1	1.76517	0.181818	0.105364	23.2	0.014	0.049212	0.00760851	0.107597	0.0211979	0.00044935	8.29904e-05	0.686257	5.5132	30.3954	0.662262	0.15979	0.516553	0.266827	0.0327094	0.139168	0.320829	0.102931	0.0146039	0.177167	0.68148	0.464415	0.0509367
	Acrylic sheet	2.3	1.8	1	1.60571	0.241546	0.108161	22.6	0.014	0.0469365	0.00710491	0.0987571	-0.0869459	0.00755959	0.00156053	0.662039	5.12085	26.2231	0.619073	0.153881	0.422702	0.178677	0.0234439	0.13542	0.25202	0.063514	0.00952795	0.170208	0.573646	0.32907	0.0387724
	Acrylic sheet	2	2	1	1.5874	0.25	0.102969	23.2	0.014	0.0466681	0.00684225	0.0996592	-0.0321473	0.00103345	0.000201377	0.662399	5.43298	29.5172	0.65353	0.153811	0.493753	0.243792	0.0303731	0.135549	0.316406	0.100113	0.014254	0.170383	0.654695	0.428625	0.0478375
	Acrylic sheet	3.7	3.2	0.5	1.80901	0.0422297	0.120726	19.5	0.014	0.0498193	0.00927697	0.146918	0.216951	0.0470677	0.0072715	0.672144	4.56749	20.862	0.556008	0.157215	0.302239	0.0913483	0.0131539	0.13666	0.131979	0.0174184	0.00289856	0.172671	0.430268	0.185131	0.0241546
	Acrylic sheet	2.9	2.2	0.5	1.47208	0.0783699	0.128314	19.7	0.014	0.0449409	0.00747247	0.127464	-0.00662162	4.38459e-05	8.32494e-06	0.628585	3.89882	15.2008	0.476226	0.146295	0.140139	0.019639	0.00324419	0.130147	0.0142886	0.000204164	3.79646e-05	0.160403	0.250084	0.0625422	0.00939723
	Acrylic sheet	3	2.3	0.5	1.51103	0.0724638	0.124794	20.2	0.014	0.0455317	0.00748035	0.132067	0.0582809	0.00339666	0.000605207	0.636736	4.10231	16.8289	0.500933	0.148196	0.187529	0.0351673	0.00557179	0.131389	0.0528494	0.00279306	0.00050025	0.162758	0.30422	0.0925497	0.0133058
	Acrylic sheet	3	1.9	0.5	1.4178	0.0877193	0.12576	20.1	0.014	0.0441047	0.00705373	0.125717	-0.000338918	1.14865e-07	2.16723e-08	0.622846	3.95265	15.6235	0.4828	0.144744	0.150953	0.0227867	0.00372801	0.129436	0.0292279	0.00085427	0.000156539	0.158851	0.263128	0.0692364	0.0102916
PET	Acrylic sheet	2.9	2.4	2	2.40554	0.287356	0.12037	21	0.014	0.0958853	0.011455	0.139647	0.160142	0.0256455	0.00416169	0.748314	5.21676	27.2146	0.629744	0.293276	1.43645	2.06339	0.149581	0.243632	1.02402	1.04862	0.0937679	0.325035	1.70029	2.891	0.186115
	Acrylic sheet	2.9	2.7	1.9	2.45945	0.242656	0.114899	22	0.014	0.0969537	0.0111793	0.150841	0.31281	0.0978503	0.0139717	0.759731	5.61216	31.4964	0.672963	0.297632	1.59038	2.5293	0.170869	0.247063	1.15026	1.32311	0.110551	0.330784	1.87891	3.53032	0.210891
	Acrylic sheet	2.8	2.8	2	2.50293	0.255102	0.117571	21.5	0.014	0.0978069	0.0116415	0.145965	0.241509	0.0583264	0.00882655	0.761259	5.47488	29.9743	0.658097	0.298427	1.53827	2.36626	0.16365	0.247727	1.10704	1.22554	0.104764	0.331417	1.81886	3.30827	0.202567
	Acrylic sheet	2.8	2	1.9	2.19945	0.339286	0.15178	16.7	0.014	0.0916858	0.0131704	0.115909	-0.236332	0.055853	0.0137114	0.699091	3.60596	13.0029	0.439993	0.274542	0.808819	0.654188	0.0662522	0.228969	0.508562	0.258635	0.0318848	0.300333	0.978741	0.957935	0.0878465
	Acrylic sheet	2.7	2	1.7	2.09386	0.314815	0.144841	17.5	0.014	0.089458	0.0119649	0.123215	-0.149308	0.0222928	0.00493192	0.693104	3.78527	14.3283	0.462273	0.271824	0.876704	0.768609	0.0747452	0.226753	0.565528	0.319822	0.0378928	0.297683	1.05524	1.11352	0.0978825
	Acrylic sheet	2.2	2	1	1.63864	0.227273	0.143205	17.7	0.014	0.0791384	0.00925787	0.142244	-0.00670556	4.49645e-05	8.53805e-06	0.639931	3.46865	12.0315	0.422729	0.249812	0.744443	0.554195	0.058398	0.209831	0.465252	0.21646	0.0275269	0.272559	0.903281	0.815917	0.0781219
	Acrylic sheet	2	1.8	0.3	1.02599	0.0833333	0.193376	13	0.014	0.0626204	0.0078922	0.168212	-0.130128	0.0169333	0.00366565	0.520013	1.68913	2.85315	0.184566	0.202272	0.0460011	0.0021161	0.000381505	0.17516	-0.0941995	0.00887355	0.0018462	0.216134	0.117687	0.0138503	0.00233485
	Acrylic sheet	2	1.9	0.3	1.04464	0.0789474	0.187604	13.4	0.014	0.0631873	0.00779585	0.173874	-0.073183	0.00535575	0.0010894	0.525795	1.80269	3.2497	0.200324	0.20446	0.0898499	0.00807301	0.00139627	0.176757	-0.0578167	0.00334277	0.000668977	0.218858	0.166597	0.0277546	0.0044784
	Acrylic sheet	2	1.8	0.3	1.02599	0.0833333	0.187604	13.4	0.014	0.0626204	0.00765661	0.171626	-0.0851648	0.00725304	0.00149437	0.522646	1.78591	3.18946	0.197995	0.203145	0.0828425	0.00686288	0.00119476	0.175909	-0.0623387	0.00388611	0.000781427	0.217448	0.159082	0.025307	0.00411061
PVC	Acrylic sheet	3.5	3	1.2	2.32697	0.114286	0.173611	14.4	0.014	0.113006	0.0161595	0.171962	-0.00949807	9.02133e-05	1.71783e-05	0.694971	3.00303	9.01822	0.362873	0.327743	0.887797	0.788184	0.0761513	0.272609	0.570228	0.32516	0.0384014	0.356754	1.0549	1.11282	0.0978384
	Acrylic sheet	3	3	1.8	2.5303	0.2	0.14244	17.6	0.014	0.11784	0.0143767	0.164281	0.153334	0.0235112	0.00383842	0.738957	4.18785	17.538	0.511206	0.348103	1.44386	2.08473	0.150603	0.28857	1.0259	1.05248	0.094015	0.383094	1.68951	2.85445	0.184619
	Acrylic sheet	3	3	2	2.62074	0.222222	0.146199	17.1	0.014	0.119928	0.015326	0.155347	0.062576	0.00391576	0.00069485	0.744076	4.08948	16.7238	0.499387	0.35074	1.39906	1.95737	0.144431	0.29091	0.989828	0.979759	0.0892907	0.385896	1.63953	2.68806	0.177685
	Acrylic sheet	2.8	2	2	2.23738	0.357143	0.145349	17.2	0.014	0.110809	0.013008	0.139121	-0.0428482	0.00183596	0.000361728	0.706552	3.86108	14.9079	0.471602	0.332438	1.28717	1.65682	0.129096	0.275759	0.897224	0.805011	0.07735	0.364317	1.5065	2.26954	0.159255
	Acrylic sheet	3	2	1	1.81712	0.166667	0.160702	15.6	0.014	0.0998617	0.0116482	0.168908	0.0510648	0.00260762	0.000467835	0.648572	3.03588	9.21657	0.367161	0.30467	0.895873	0.802588	0.077178	0.253574	0.577916	0.333987	0.0392372	0.330815	1.05857	1.12056	0.0983227
	Acrylic sheet	2.4	1.2	1	1.42276	0.347222	0.16713	15	0.014	0.0883634	0.00948505	0.137925	-0.174744	0.0305356	0.00695749	0.593884	2.55344	6.52003	0.303214	0.277946	0.663058	0.439645	0.0488	0.232796	0.392905	0.154375	0.0207134	0.300022	0.795146	0.632258	0.0645667
	Acrylic sheet	3	1.6	1	1.68687	0.208333	0.161738	15.5	0.014	0.096216	0.010883	0.159395	-0.014488	0.000209903	4.01716e-05	0.632012	2.90762	8.45424	0.35036	0.296557	0.833559	0.69482	0.0693241	0.247175	0.528241	0.279038	0.0339266	0.321459	0.987527	0.975209	0.0889906
	Acrylic sheet	2	1.7	0.5	1.19348	0.147059	0.192842	13	0.014	0.0809311	0.00918064	0.166321	-0.137528	0.0189139	0.00412869	0.546897	1.83599	3.37085	0.204941	0.255783	0.326388	0.106529	0.0150481	0.215935	0.119752	0.0143406	0.00241296	0.273496	0.418238	0.174923	0.0230278
	Acrylic sheet	2.7	2.5	0.5	1.5	0.0740741	0.18992	13.2	0.014	0.0907304	0.0113636	0.198161	0.0433938	0.00188302	0.000340338	0.591701	2.11553	4.47546	0.243574	0.277844	0.462952	0.214325	0.027301	0.232578	0.224611	0.0504499	0.00774365	0.298162	0.569934	0.324825	0.0383695
	Acrylic sheet	3	1.8	0.5	1.39248	0.0925926	0.18992	13.2	0.014	0.087418	0.0105491	0.1878	-0.0111618	0.000124585	2.37632e-05	0.577211	2.03923	4.15847	0.233061	0.270694	0.425304	0.180884	0.0236875	0.227092	0.195726	0.0383086	0.00602667	0.290159	0.527797	0.27857	0.0338802
	Acrylic sheet	3.8	1.8	0.5	1.50664	0.0730994	0.192842	13	0.014	0.0909309	0.0115895	0.196792	0.0204835	0.000419575	7.75456e-05	0.591067	2.06503	4.26436	0.236619	0.277634	0.439698	0.193334	0.0250498	0.232412	0.205195	0.0421051	0.0065703	0.297734	0.543929	0.295859	0.0355802
PS	carpet	3	2.2	1.9	2.32327	0.287879	0.0818113	14.6	0.022	0.0337402	0.0159128	0.104927	0.282555	0.0798374	0.0116804	0.696201	7.50985	56.3978	0.864755	0.0980929	0.199015	0.0396068	0.0062133	0.0897432	0.0969539	0.00940006	0.00161511	0.106832	0.305836	0.0935354	0.0134301
	carpet	3	2	1.9	2.25062	0.316667	0.0796296	15	0.022	0.0332085	0.0150041	0.103235	0.296442	0.0878781	0.0127133	0.691978	7.68995	59.1354	0.881754	0.0974459	0.223739	0.0500592	0.00768933	0.0895386	0.124438	0.0154849	0.00259445	0.106153	0.333085	0.110946	0.0155895
	carpet	3	2.6	2	2.49867	0.25641	0.0822869	14.6	0.022	0.0349907	0.0171142	0.108821	0.322458	0.103979	0.0147336	0.713298	7.66843	58.8048	0.879732	0.100556	0.222017	0.0492914	0.00758243	0.0910852	0.106922	0.0114324	0.00194632	0.109758	0.333842	0.11145	0.0156511
	carpet	3	1.6	1.2	1.79256	0.25	0.0889918	13.5	0.022	0.0296371	0.0132782	0.0999398	0.123023	0.0151346	0.002539	0.630265	6.08229	36.9942	0.722795	0.0886333	-0.00402848	1.62286e-05	3.07329e-06	0.0850673	-0.0440993	0.00194475	0.000383659	0.0955517	0.073714	0.00543376	0.000954108
	carpet	3	2.3	1.7	2.27213	0.246377	0.0896559	13.4	0.022	0.0333668	0.0169562	0.104848	0.169448	0.0287126	0.0046214	0.681247	6.59847	43.5398	0.775678	0.0960317	0.0711148	0.00505732	0.000890188	0.0882811	-0.0153338	0.000235126	4.50373e-05	0.104152	0.161684	0.0261418	0.00423645
	carpet	3	2	2	2.28943	0.333333	0.0889918	13.5	0.022	0.0334936	0.0169587	0.0993975	0.116929	0.0136725	0.00230647	0.683819	6.68407	44.6768	0.784272	0.0963943	0.0831827	0.00691937	0.00120421	0.0885025	-0.00549747	3.02222e-05	5.73175e-06	0.104601	0.175397	0.030764	0.00492586
	carpet	4	2.2	0.8	1.91657	0.0909091	0.0953483	12.6	0.022	0.030645	0.0152109	0.120114	0.259738	0.0674638	0.0100561	0.637108	5.6819	32.284	0.68046	0.0897308	-0.0589161	0.0034711	0.000695464	0.0850224	-0.108297	0.0117281	0.002478	0.0965974	0.0131006	0.000171625	3.19514e-05
	carpet	4	2.3	0.8	1.94518	0.0869565	0.0961111	12.5	0.022	0.0308729	0.0155614	0.121197	0.261006	0.0681242	0.010144	0.639413	5.65285	31.9547	0.677341	0.0900742	-0.0628119	0.00394534	0.000793731	0.0851152	-0.114408	0.0130892	0.00278429	0.096973	0.00896752	8.04164e-05	1.50326e-05
	carpet	3	2	0.8	1.68687	0.133333	0.105385	11.4	0.022	0.02875	0.0147971	0.105689	0.00288103	8.30036e-06	1.56105e-06	0.600465	4.69782	22.0695	0.571095	0.0845471	-0.197731	0.0390976	0.00915468	0.0824508	-0.217623	0.0473598	0.0113601	0.0903299	-0.142858	0.0204084	0.00448192
	carpet	3	2.5	0.8	1.81712	0.106667	0.106318	11.3	0.022	0.0298394	0.0160807	0.111598	0.0496675	0.00246686	0.000443176	0.614635	4.78112	22.8591	0.580663	0.0866079	-0.185385	0.0343677	0.00792951	0.0830986	-0.218393	0.0476954	0.0114514	0.0926758	-0.128312	0.0164639	0.00355678
PA	carpet	3.2	2.3	2.1	2.49095	0.285326	0.141173	15.2	0.022	0.0584601	0.0163879	0.180509	0.278637	0.0776387	0.011395	0.717363	4.08144	16.6581	0.498417	0.16917	0.198312	0.0393275	0.0061732	0.144408	0.0229139	0.000525047	9.68075e-05	0.184933	0.309969	0.096081	0.0137502
	carpet	3.2	2.1	2	2.37757	0.297619	0.144989	14.8	0.022	0.0571141	0.0160647	0.176001	0.213898	0.0457522	0.00708662	0.703177	3.84987	14.8215	0.470226	0.165798	0.143525	0.0205994	0.00339255	0.141885	-0.0214063	0.000458229	8.83145e-05	0.180795	0.246956	0.0609872	0.00918743
	carpet	3.2	2.7	2.5	2.78495	0.289352	0.141173	15.2	0.022	0.0618139	0.0183221	0.184094	0.304031	0.0924346	0.0132913	0.744543	4.27396	18.2668	0.521482	0.1757	0.244568	0.0598135	0.00902854	0.14941	0.0583461	0.00340426	0.000606524	0.192764	0.365442	0.133548	0.0182988
	carpet	3	2.7	2.2	2.61198	0.271605	0.147989	14.5	0.022	0.0598634	0.0180136	0.181352	0.225449	0.0508271	0.00779603	0.723093	3.88614	15.1021	0.474674	0.170624	0.152952	0.0233943	0.00382063	0.145528	-0.016629	0.000276523	5.30362e-05	0.186455	0.259929	0.067563	0.0100693
	carpet	3	2.8	1.2	2.16016	0.142857	0.191592	11.2	0.022	0.0544403	0.0192872	0.18244	-0.047771	0.00228207	0.000451927	0.650142	2.39336	5.72819	0.281569	0.153454	-0.199057	0.0396237	0.00929264	0.132687	-0.307451	0.094526	0.025456	0.165019	-0.138695	0.0192362	0.00420459
	carpet	3	2.2	1	1.87578	0.151515	0.189897	11.3	0.022	0.0507303	0.0165998	0.175868	-0.073876	0.00545767	0.00111095	0.621179	2.27114	5.15807	0.264915	0.146501	-0.228522	0.0522222	0.012696	0.127769	-0.327165	0.107037	0.0296154	0.156905	-0.173736	0.0301842	0.00686929
	carpet	3.1	2.4	1.2	2.07452	0.16129	0.187409	11.3	0.022	0.0533502	0.0183586	0.177338	-0.0537372	0.00288769	0.000575436	0.642385	2.42772	5.89381	0.28623	0.151594	-0.191108	0.0365223	0.00848417	0.131341	-0.299172	0.089504	0.0238359	0.162856	-0.131016	0.0171651	0.00371954
	carpet	3.1	2	1	1.83709	0.16129	0.214583	10	0.022	0.0502045	0.0183709	0.166848	-0.222456	0.0494865	0.011941	0.60444	1.81681	3.30079	0.202282	0.14264	-0.335272	0.112407	0.0314551	0.1249	-0.417943	0.174676	0.0552412	0.151943	-0.291916	0.085215	0.0224746
	carpet	2.2	2	1	1.63864	0.227273	0.238426	9	0.022	0.0474154	0.0182071	0.148086	-0.3789	0.143565	0.0427821	0.571713	1.39787	1.95403	0.144267	0.134911	-0.434161	0.188496	0.0611607	0.119524	-0.498694	0.248696	0.0899382	0.142641	-0.401737	0.161393	0.0497771
	carpet	3	2	1	1.81712	0.166667	0.238426	9	0.022	0.0499308	0.0201902	0.160307	-0.327643	0.10735	0.0297219	0.591759	1.48194	2.19615	0.15586	0.139692	-0.414109	0.171486	0.053909	0.12271	-0.485331	0.235546	0.083216	0.148176	-0.378523	0.14328	0.0426733
	carpet	2.9	1.2	1	1.5154	0.287356	0.235806	9.1	0.022	0.0455974	0.0166527	0.139929	-0.40659	0.165316	0.0513681	0.558032	1.36649	1.86729	0.139954	0.131611	-0.441866	0.195245	0.0641412	0.117492	-0.501741	0.251744	0.0915334	0.138912	-0.410904	0.168842	0.0528143
	carpet	2.7	2.3	0.5	1.45888	0.0805153	0.241105	8.9	0.022	0.0447391	0.0163919	0.175446	-0.272325	0.0741611	0.0190613	0.54897	1.27689	1.63045	0.127693	0.129459	-0.463059	0.214424	0.0729398	0.116113	-0.518413	0.268752	0.100695	0.136385	-0.434334	0.188646	0.0612267
	carpet	2.2	2.2	0.5	1.34257	0.103306	0.243845	8.8	0.022	0.0429187	0.0152565	0.164057	-0.327205	0.107063	0.0296244	0.53297	1.1857	1.40587	0.115321	0.12561	-0.484879	0.235107	0.0829962	0.113863	-0.533052	0.284145	0.109383	0.13201	-0.458633	0.210344	0.0710265
	carpet	3	2.1	0.5	1.4659	0.0793651	0.243845	8.8	0.022	0.0448465	0.0166579	0.175497	-0.280294	0.0785646	0.0204046	0.548813	1.25067	1.56417	0.124123	0.129438	-0.46918	0.22013	0.0756542	0.116054	-0.524066	0.274646	0.103976	0.136316	-0.440972	0.194457	0.0637899
	carpet	2.2	1.4	0.5	1.1548	0.162338	0.246648	8.7	0.022	0.0398043	0.0132736	0.145654	-0.409467	0.167663	0.0523292	0.505901	1.05111	1.10483	0.0973368	0.119046	-0.517343	0.267643	0.100084	0.110462	-0.552147	0.304866	0.121707	0.124698	-0.49443	0.244461	0.0877453
PET	carpet	2.9	2.9	2	2.56217	0.237812	0.289352	12	0.022	0.0989577	0.0213515	0.292125	0.0095852	9.18761e-05	1.71643e-05	0.696161	1.40593	1.97664	0.145377	0.274307	-0.0519961	0.00270359	0.00053777	0.230092	-0.204803	0.0419443	0.00990528	0.297507	0.0281855	0.000794421	0.00014572
	carpet	2.9	2.8	2	2.53238	0.246305	0.294256	11.8	0.022	0.0983806	0.0214608	0.28806	-0.0210565	0.000443377	8.54217e-05	0.691512	1.35003	1.82259	0.137696	0.272476	-0.0740188	0.00547878	0.00111541	0.228644	-0.222978	0.0497191	0.0120048	0.295223	0.00328626	1.07995e-05	2.03023e-06
	carpet	2.4	2	1.1	1.74132	0.229167	0.443948	11.2	0.022	0.0815801	0.0155475	0.266731	-0.399184	0.159348	0.0489554	0.60507	0.362928	0.131717	0.018083	0.23805	-0.463789	0.2151	0.073259	0.200608	-0.548129	0.300445	0.119015	0.254344	-0.427087	0.182404	0.0585212
	carpet	2.8	2	1.7	2.1194	0.303571	0.443948	11.2	0.022	0.0900019	0.0189232	0.263064	-0.407444	0.166011	0.0516519	0.646026	0.455183	0.207192	0.0265422	0.254484	-0.426772	0.182134	0.0584056	0.213851	-0.518298	0.268633	0.10063	0.273489	-0.383963	0.147428	0.0442654
	carpet	2.2	2	0.3	1.09696	0.0681818	0.377137	13	0.022	0.0647502	0.00843816	0.319786	-0.152069	0.023125	0.00513223	0.531738	0.409933	0.168045	0.0222602	0.207157	-0.450711	0.20314	0.0677035	0.178357	-0.527076	0.27781	0.105761	0.221391	-0.412969	0.170543	0.0535177
	carpet	2.8	2.3	0.3	1.24548	0.0465839	0.363169	13.5	0.022	0.0689943	0.00922576	0.35651	-0.0183341	0.000336139	6.4582e-05	0.558227	0.5371	0.288477	0.0348577	0.217901	-0.4	0.16	0.0492169	0.185861	-0.488223	0.238362	0.0846339	0.233551	-0.356907	0.127382	0.0367589
PVC	carpet	4	3.8	1.8	3.01327	0.118421	0.323255	11.3	0.022	0.128596	0.0266661	0.40515	0.253347	0.0641849	0.00961801	0.727505	1.25056	1.5639	0.124109	0.343303	0.0620214	0.00384666	0.000682948	0.288132	-0.108652	0.0118052	0.00249526	0.374146	0.157434	0.0247856	0.00403179
	carpet	3.8	3.2	2	2.89726	0.164474	0.365278	10	0.022	0.126096	0.0289726	0.364182	-0.00299998	8.99986e-06	1.70258e-06	0.703567	0.926116	0.857691	0.0810441	0.331814	-0.0916108	0.00839255	0.00174123	0.279396	-0.235114	0.0552787	0.0135498	0.359813	-0.0149609	0.000223829	4.28572e-05
	carpet	3	2	2	2.28943	0.333333	0.351229	10.4	0.022	0.112091	0.0220137	0.307606	-0.124201	0.0154259	0.00331724	0.654723	0.864094	0.746658	0.0731528	0.309135	-0.119846	0.0143631	0.00307375	0.259012	-0.262554	0.0689347	0.0174953	0.332264	-0.0539952	0.00291548	0.000581132
	carpet	3	2	1	1.81712	0.166667	0.33822	10.8	0.022	0.0998617	0.0168252	0.338639	0.00123965	1.53673e-06	2.89486e-07	0.610017	0.803608	0.645785	0.0656088	0.287765	-0.149179	0.0222543	0.00492267	0.240832	-0.287944	0.0829116	0.021752	0.307358	-0.0912487	0.00832633	0.00172682
	carpet	3.1	2	1	1.83709	0.16129	0.280983	13	0.022	0.100409	0.0141315	0.361022	0.284856	0.0811427	0.0118493	0.631457	1.24731	1.55579	0.123668	0.297407	0.0584507	0.00341648	0.00060864	0.248076	-0.117114	0.0137158	0.00292633	0.320258	0.139776	0.0195373	0.00322845
	carpet	4	1.1	1	1.63864	0.227273	0.270576	13.5	0.022	0.0948307	0.0121381	0.334482	0.236184	0.0557829	0.0084793	0.611683	1.26067	1.58929	0.125484	0.287522	0.0626299	0.0039225	0.000696011	0.24013	-0.112524	0.0126617	0.00268774	0.309381	0.143416	0.0205683	0.00338776
	carpet	2.8	1.6	1	1.64851	0.223214	0.292222	12.5	0.022	0.095116	0.0131881	0.328357	0.123655	0.0152905	0.00256369	0.605098	1.07068	1.14635	0.099927	0.284754	-0.0255561	0.000653114	0.000126409	0.238021	-0.185479	0.0344025	0.0079384	0.305329	0.0448522	0.00201172	0.000363088
	carpet	4	2.8	0.5	1.77581	0.0446429	0.365278	10	0.022	0.09872	0.0177581	0.422512	0.156687	0.0245509	0.00399625	0.597643	0.636133	0.404665	0.0457183	0.282022	-0.227923	0.0519491	0.0126202	0.236431	-0.352735	0.124422	0.0356901	0.300108	-0.178412	0.0318307	0.0072839
	carpet	3.9	2.8	0.5	1.76088	0.0457875	0.365278	10	0.022	0.0983043	0.0176088	0.419786	0.149224	0.0222678	0.00364873	0.595964	0.631536	0.398838	0.0451974	0.281217	-0.230129	0.0529593	0.0129009	0.23577	-0.354547	0.125704	0.0361515	0.299176	-0.180963	0.0327475	0.00751626
PS	sod	3	3	2.3	2.74572	0.255556	0.119048	10.5	0.027	0.0366798	0.0261497	0.115923	-0.0262426	0.000688676	0.000133385	0.696723	4.85247	23.5465	0.58881	0.0982517	-0.174686	0.0305151	0.00695232	0.0887851	-0.254205	0.0646202	0.0162258	0.10642	-0.106071	0.0112511	0.0023714
	sod	3	2.8	2.4	2.72164	0.285714	0.122148	11.2	0.027	0.0365185	0.0243003	0.11419	-0.0651452	0.0042439	0.000855905	0.702192	4.74871	22.5502	0.576947	0.0990529	-0.189073	0.0357487	0.00828435	0.0894141	-0.267985	0.0718159	0.0183548	0.10745	-0.120329	0.014479	0.00310022
	sod	3	2.9	2.1	2.63378	0.241379	0.12945	10.3	0.027	0.0359243	0.0255707	0.115311	-0.109219	0.0119288	0.00252296	0.684924	4.29104	18.413	0.523511	0.0965983	-0.253778	0.0644032	0.0161625	0.0877118	-0.322426	0.103959	0.0285757	0.104383	-0.193639	0.0374962	0.00873676
	sod	3	2.8	1.9	2.51774	0.22619	0.136806	10	0.027	0.035124	0.0251774	0.11456	-0.162606	0.0264407	0.00593982	0.671398	3.90768	15.27	0.47731	0.094697	-0.307798	0.0947399	0.0255256	0.0864914	-0.367779	0.135261	0.0396531	0.102045	-0.254088	0.0645607	0.0162085
	sod	3.2	2	1	1.85664	0.15625	0.139598	9.8	0.027	0.0301621	0.0189453	0.111362	-0.202266	0.0409114	0.0096318	0.604537	3.33057	11.0927	0.40519	0.0852682	-0.389185	0.151465	0.0458347	0.0816812	-0.414881	0.172126	0.0541752	0.090791	-0.349623	0.122236	0.0349073
	sod	3	2.1	1.4	2.06612	0.222222	0.149254	13.4	0.027	0.0318182	0.0154188	0.113101	-0.242223	0.0586718	0.0145102	0.660003	3.42202	11.7102	0.416826	0.0929671	-0.377121	0.14222	0.0422697	0.0867888	-0.418515	0.175155	0.0554422	0.100549	-0.326323	0.106487	0.0294289
	sod	3	2	1.3	1.98319	0.216667	0.142857	14	0.027	0.0311731	0.0141657	0.112985	-0.209104	0.0437247	0.0103797	0.655822	3.59075	12.8935	0.438091	0.0922987	-0.353909	0.125252	0.0359885	0.0867503	-0.392748	0.154251	0.0469289	0.0999082	-0.300643	0.0903861	0.0241184
	sod	3.9	2.9	0.8	2.08378	0.0707339	0.190476	10.5	0.027	0.0319539	0.0198455	0.137821	-0.276441	0.0764196	0.0197476	0.635514	2.33645	5.45898	0.273826	0.0896507	-0.529334	0.280194	0.107117	0.0839694	-0.559161	0.312661	0.126537	0.0960641	-0.495664	0.245682	0.0883753
	sod	3.7	2.1	0.8	1.83867	0.10296	0.188679	10.6	0.027	0.0300158	0.0173459	0.122568	-0.350391	0.122774	0.0350992	0.610513	2.23572	4.99845	0.260071	0.0860734	-0.543811	0.295731	0.116182	0.0824813	-0.562849	0.316799	0.129146	0.0918968	-0.512947	0.263114	0.0976085
	sod	2.3	2.1	0.8	1.5692	0.165631	0.185185	10.8	0.027	0.0277292	0.0145297	0.105769	-0.42885	0.183912	0.0591703	0.580907	2.1369	4.56633	0.246513	0.0817779	-0.558399	0.31181	0.126004	0.0812338	-0.561337	0.3151	0.12807	0.0870153	-0.530117	0.281024	0.107591
	sod	2.4	2	0.8	1.56595	0.166667	0.181818	11	0.027	0.0277004	0.0142359	0.105886	-0.417627	0.174412	0.0551304	0.582283	2.20256	4.85126	0.255527	0.0819535	-0.549256	0.301682	0.119764	0.0814304	-0.552133	0.30485	0.121697	0.0872687	-0.520022	0.270423	0.10162
PA	sod	3.1	2.5	2.3	2.61222	0.296774	0.166188	14.5	0.027	0.0598662	0.0180153	0.195315	0.175268	0.0307189	0.00491919	0.723116	3.3512	11.2305	0.407821	0.170629	0.0267246	0.000714203	0.000131193	0.145532	-0.124293	0.0154488	0.00332251	0.186461	0.121993	0.0148823	0.00249901
	sod	3	2.5	2.2	2.54582	0.293333	0.162819	14.8	0.027	0.0591005	0.0172015	0.194787	0.196343	0.0385506	0.00606152	0.719387	3.41832	11.6849	0.416357	0.169704	0.0422868	0.00178818	0.000323541	0.144815	-0.110576	0.012227	0.00258989	0.185444	0.138956	0.0193088	0.00319305
	sod	3	2.7	2.5	2.72568	0.308642	0.160648	15	0.027	0.0611525	0.0181712	0.19762	0.230145	0.0529666	0.00809212	0.737593	3.59136	12.8978	0.438166	0.174053	0.0834403	0.00696229	0.00121139	0.148144	-0.0778356	0.00605837	0.00123845	0.190721	0.1872	0.0350438	0.0055538
	sod	3	2	2	2.28943	0.333333	0.172123	14	0.027	0.0560455	0.0163531	0.181453	0.0542061	0.00293831	0.00052558	0.687976	2.997	8.98203	0.362084	0.162237	-0.0574363	0.00329893	0.00065994	0.139228	-0.191111	0.0365236	0.0084845	0.176308	0.0243143	0.000591185	0.000108852
	sod	3.2	2.3	2	2.45077	0.271739	0.165049	14.6	0.027	0.0579867	0.0167861	0.19495	0.18116	0.0328191	0.00522857	0.708711	3.29393	10.85	0.400506	0.167159	0.0127784	0.000163287	3.04088e-05	0.142896	-0.134225	0.0180164	0.00391814	0.182344	0.104786	0.0109802	0.00187301
	sod	2.2	2	1.6	1.91657	0.363636	0.155466	15.5	0.027	0.051279	0.012365	0.170913	0.0993592	0.00987226	0.00169247	0.659487	3.242	10.5106	0.393846	0.155038	-0.00275137	7.57003e-06	1.43174e-06	0.134352	-0.135811	0.0184445	0.00401842	0.168476	0.0836813	0.00700256	0.00121812
	sod	2.7	2	1.1	1.81104	0.203704	0.154469	15.6	0.027	0.0498473	0.0116093	0.1892	0.224841	0.0505535	0.00775804	0.647848	3.19403	10.2018	0.387669	0.152157	-0.0149712	0.000224136	4.29164e-05	0.132466	-0.142443	0.02029	0.00445383	0.165203	0.0694876	0.00482853	0.000851225
	sod	2.1	2	1.3	1.76088	0.309524	0.166188	14.5	0.027	0.0491521	0.012144	0.169867	0.022137	0.000490049	9.04235e-05	0.634037	2.81519	7.92527	0.338161	0.149016	-0.103328	0.0106767	0.00224358	0.130157	-0.216806	0.0470049	0.0112637	0.161128	-0.0304471	0.000927025	0.000180324
	sod	2.1	2	1	1.61343	0.238095	0.157498	15.3	0.027	0.0470492	0.0105453	0.175747	0.11587	0.0134258	0.00226704	0.621358	2.94517	8.67404	0.355295	0.145698	-0.0749251	0.00561377	0.001144	0.128308	-0.185334	0.0343487	0.00792464	0.157711	0.00134813	1.81746e-06	3.42333e-07
	sod	3	2.8	1	2.03279	0.119048	0.192778	12.5	0.027	0.0528109	0.0162623	0.211577	0.0975163	0.00950942	0.00163305	0.648872	2.36591	5.59752	0.277837	0.153009	-0.206294	0.0425572	0.0100682	0.132465	-0.312864	0.0978837	0.026555	0.164931	-0.144448	0.0208651	0.00459052
	sod	2.9	2.1	1	1.82616	0.164204	0.166188	14.5	0.027	0.0500549	0.0125942	0.195916	0.178885	0.032	0.00510819	0.641777	2.86176	8.18966	0.344317	0.150914	-0.0919063	0.00844677	0.00175304	0.131395	-0.209358	0.0438307	0.0104081	0.163305	-0.0173489	0.000300983	5.77697e-05
	sod	3.1	2	1	1.83709	0.16129	0.17983	13.4	0.027	0.0502045	0.0137096	0.194436	0.08122	0.00659669	0.00115016	0.634655	2.52919	6.39681	0.299948	0.149404	-0.169195	0.0286269	0.00648039	0.130148	-0.276272	0.076326	0.019719	0.161102	-0.104141	0.0108454	0.00228107
	sod	3.2	2.1	0.5	1.49777	0.0744048	0.184295	13	0.027	0.0453315	0.0115213	0.212002	0.15034	0.0226022	0.00369984	0.589905	2.20088	4.84387	0.255297	0.138531	-0.248317	0.0616616	0.0153675	0.123211	-0.331446	0.109857	0.0305773	0.148546	-0.193979	0.0376277	0.00877096
	sod	3	1.4	0.5	1.28058	0.119048	0.178794	13.4	0.027	0.041916	0.00955656	0.183617	0.0269774	0.000727779	0.000133654	0.562725	2.14734	4.61109	0.247948	0.131702	-0.263388	0.069373	0.0176255	0.119668	-0.330693	0.109358	0.0304064	0.141141	-0.21059	0.0443482	0.0105468
	sod	2.2	2	0.5	1.30059	0.113636	0.177185	13.6	0.027	0.0422423	0.00956317	0.186806	0.0542977	0.00294825	0.000527312	0.567039	2.20026	4.84114	0.255212	0.132713	-0.250993	0.0629974	0.0157538	0.120288	-0.321118	0.103117	0.0282931	0.142361	-0.196542	0.0386289	0.00903203
PET	sod	3	3	2	2.62074	0.222222	0.351337	13.5	0.027	0.100082	0.0194129	0.342249	-0.0258695	0.000669233	0.00012957	0.715331	1.03602	1.07334	0.0953465	0.281809	-0.197895	0.0391626	0.00917169	0.235721	-0.329076	0.108291	0.0300422	0.307168	-0.125717	0.0158049	0.00340451
	sod	2.9	2.9	2	2.56217	0.237812	0.354771	13.8	0.027	0.0989577	0.0185665	0.336218	-0.0522956	0.00273483	0.000544153	0.712567	1.00853	1.01713	0.0917352	0.280674	-0.208859	0.043622	0.0103522	0.234643	-0.338605	0.114653	0.0322343	0.305941	-0.137638	0.0189441	0.00413581
	sod	3	2.7	2	2.5303	0.246914	0.35736	13.7	0.027	0.0983402	0.0184693	0.331837	-0.0714215	0.00510103	0.00103564	0.70874	0.983266	0.966812	0.0884355	0.27916	-0.218828	0.0478857	0.0115033	0.233413	-0.34684	0.120298	0.0342177	0.304078	-0.149098	0.0222303	0.0049169
	sod	2.9	2.9	2	2.56217	0.237812	0.359988	13.6	0.027	0.0989577	0.0188395	0.335394	-0.0683183	0.00466738	0.000944481	0.710835	0.97461	0.949865	0.0873092	0.280009	-0.222172	0.0493604	0.0119064	0.234164	-0.349523	0.122166	0.0348823	0.305049	-0.152613	0.0232909	0.00517226
	sod	2.8	2.6	2	2.44186	0.274725	0.35736	13.7	0.027	0.0966063	0.0178238	0.320809	-0.102282	0.0104616	0.00219586	0.700385	0.959885	0.921379	0.0853987	0.27582	-0.228174	0.0520632	0.0126518	0.230628	-0.354635	0.125766	0.0361739	0.300087	-0.160268	0.0256858	0.00575464
	sod	3	2	2	2.28943	0.333333	0.373728	13.1	0.027	0.0935425	0.0174766	0.299492	-0.198637	0.0394565	0.00924876	0.680399	0.820575	0.673344	0.0677085	0.26792	-0.283116	0.0801545	0.020895	0.224281	-0.39988	0.159904	0.0491784	0.290382	-0.223013	0.0497348	0.0120091
	sod	2.9	2	0.3	1.20277	0.0517241	0.359988	13.6	0.027	0.0678011	0.00884391	0.357274	-0.00753846	5.68284e-05	1.07999e-05	0.552451	0.534639	0.285839	0.0345983	0.215452	-0.401501	0.161203	0.0497008	0.184192	-0.488337	0.238473	0.0846903	0.230955	-0.358436	0.128477	0.0371566
	sod	2.2	2.1	0.3	1.11495	0.0649351	0.35736	13.7	0.027	0.0652789	0.0081383	0.332854	-0.0685756	0.00470261	0.000951869	0.539322	0.509183	0.259267	0.0319487	0.209936	-0.412537	0.170187	0.05337	0.180486	-0.494948	0.244973	0.0880093	0.225041	-0.370269	0.137099	0.0403388
	sod	2.9	2	0.3	1.20277	0.0517241	0.35736	13.7	0.027	0.0678011	0.00877935	0.357714	0.000990289	9.80672e-07	1.84783e-07	0.553126	0.547812	0.300098	0.035993	0.215681	-0.396461	0.157181	0.04809	0.184382	-0.484044	0.234298	0.0825913	0.231294	-0.352771	0.124448	0.0356992
	sod	2.1	1.8	0.3	1.04281	0.0793651	0.365361	13.4	0.027	0.0631317	0.00778215	0.311201	-0.148237	0.0219742	0.00485546	0.525487	0.438269	0.19208	0.0249135	0.204331	-0.440741	0.194253	0.0636993	0.176674	-0.51644	0.266711	0.0995718	0.21872	-0.401359	0.161089	0.0496549
	sod	3	1.5	0.3	1.10521	0.0666667	0.349702	14	0.027	0.0649932	0.00789435	0.331295	-0.0526374	0.0027707	0.000551488	0.539692	0.543289	0.295163	0.0355124	0.209928	-0.399696	0.159757	0.0491194	0.180598	-0.483567	0.233837	0.0823609	0.225304	-0.355726	0.126541	0.0364541
	sod	2.8	2	0.3	1.18878	0.0535714	0.35736	13.7	0.027	0.0674057	0.00867726	0.353761	-0.0100714	0.000101433	1.93259e-05	0.550974	0.541788	0.293535	0.0353533	0.214786	-0.398964	0.159173	0.0488851	0.183767	-0.485764	0.235967	0.0834273	0.230316	-0.355508	0.126386	0.0363979
PVC	sod	3.9	3.8	1.7	2.93156	0.11471	0.344777	14.2	0.027	0.12684	0.0206448	0.49194	0.426835	0.182189	0.0238313	0.748843	1.17196	1.3735	0.11347	0.353561	0.0254766	0.000649055	0.000119372	0.294667	-0.145341	0.021124	0.00465221	0.387648	0.124343	0.0154612	0.0025907
	sod	4	3.7	2	3.09336	0.135135	0.412582	15.3	0.027	0.130293	0.020218	0.490277	0.188315	0.0354624	0.00561473	0.771913	0.870934	0.758526	0.0740158	0.364439	-0.116685	0.0136155	0.00290355	0.303391	-0.264652	0.0700405	0.0178241	0.401427	-0.0270351	0.000730899	0.000141678
	sod	3.3	3.2	2.1	2.80949	0.198864	0.443981	15	0.027	0.124171	0.0187299	0.437073	-0.0155604	0.000242126	4.63886e-05	0.745076	0.67817	0.459915	0.0505512	0.351686	-0.207882	0.0432151	0.0102435	0.292581	-0.341007	0.116286	0.0328041	0.385765	-0.131124	0.0171935	0.00372615
	sod	3	2.3	2.1	2.43794	0.304348	0.374142	17.8	0.027	0.115669	0.0136963	0.393112	0.0507039	0.00257089	0.000461406	0.73123	0.95442	0.910917	0.0846914	0.344273	-0.0798328	0.00637328	0.00130561	0.285353	-0.237314	0.0563181	0.0138426	0.378695	0.0121694	0.000148094	2.7596e-05
	sod	3.1	2.1	1.7	2.22849	0.261137	0.378393	17.6	0.027	0.110589	0.0126619	0.393042	0.0387136	0.00149874	0.000272111	0.708324	0.871925	0.760253	0.074141	0.33315	-0.119567	0.0142963	0.0030585	0.276274	-0.269876	0.0728329	0.0186604	0.365456	-0.0341905	0.00116899	0.000228268
	sod	3	2.8	1.2	2.16016	0.142857	0.35805	18.6	0.027	0.108881	0.0116138	0.444577	0.241662	0.0584006	0.00883665	0.707496	0.975973	0.952523	0.0874864	0.332334	-0.0718214	0.00515831	0.00104772	0.275487	-0.230588	0.053171	0.0129598	0.365279	0.0201898	0.000407629	7.53596e-05
	sod	2.8	2	2	2.23738	0.357143	0.378393	17.6	0.027	0.110809	0.0127124	0.36898	-0.0248772	0.000618876	0.000119699	0.709265	0.874411	0.764595	0.0744552	0.333611	-0.118349	0.0140065	0.00299246	0.27665	-0.268884	0.0722985	0.0184997	0.365996	-0.0327639	0.00107347	0.000209309
	sod	3.7	3.2	1	2.27921	0.0844595	0.40362	16.5	0.027	0.11184	0.0138134	0.494266	0.224584	0.0504378	0.00774197	0.706022	0.749227	0.561341	0.0589743	0.332438	-0.176357	0.0311018	0.00709992	0.275897	-0.316443	0.100136	0.0272994	0.363792	-0.0986767	0.0097371	0.00203576
	sod	3.8	2.7	1	2.17295	0.0974659	0.416233	16	0.027	0.109202	0.0135809	0.469913	0.128967	0.0166325	0.00277532	0.69132	0.660899	0.436788	0.0485512	0.32545	-0.218106	0.0475704	0.0114174	0.270275	-0.350665	0.122966	0.0351679	0.355218	-0.146588	0.0214881	0.00473914
	sod	3.8	3	1	2.25062	0.0877193	0.416233	16	0.027	0.111137	0.0140664	0.485856	0.16727	0.0279791	0.00451197	0.699461	0.680457	0.463022	0.0508175	0.329418	-0.208572	0.0435022	0.0103202	0.273528	-0.342849	0.117545	0.0332459	0.359871	-0.135408	0.0183354	0.00399283
	sod	3	2.2	1	1.87578	0.151515	0.41885	15.9	0.027	0.101461	0.0117973	0.408212	-0.0253996	0.000645141	0.000124845	0.657561	0.569919	0.324808	0.0383679	0.308954	-0.262377	0.0688415	0.0174677	0.256963	-0.386504	0.149385	0.0450238	0.335993	-0.197821	0.0391333	0.00916402
	sod	3.5	2.2	0.5	1.56731	0.0649351	0.435276	15.3	0.027	0.0927436	0.0102438	0.454964	0.0452311	0.00204586	0.000369114	0.615379	0.413768	0.171204	0.0226136	0.288438	-0.337344	0.113801	0.0319379	0.240852	-0.446669	0.199513	0.0660567	0.31208	-0.28303	0.0801062	0.02088
	sod	3	2	0.5	1.44225	0.0833333	0.432449	15.4	0.027	0.0889667	0.00936526	0.420867	-0.0267835	0.000717358	0.000139017	0.599207	0.385611	0.148696	0.0200622	0.280364	-0.351683	0.123681	0.035424	0.234678	-0.457329	0.20915	0.0704709	0.30311	-0.299086	0.0894526	0.0238194
	sod	3	2.1	0.5	1.4659	0.0793651	0.421501	15.8	0.027	0.0896931	0.00927783	0.429265	0.0184194	0.000339275	6.28321e-05	0.605044	0.43545	0.189617	0.0246452	0.283041	-0.328494	0.107908	0.0299118	0.236757	-0.4383	0.192107	0.0627479	0.306487	-0.272869	0.0744577	0.0191511
	sod	2.5	2.1	0.5	1.37946	0.0952381	0.443981	15	0.027	0.0870086	0.00919641	0.401662	-0.0953185	0.00908561	0.00189262	0.587798	0.323925	0.104927	0.0148507	0.274922	-0.38078	0.144993	0.0433284	0.230513	-0.480804	0.231172	0.0810362	0.296655	-0.331831	0.110112	0.0306649
	sod	2.5	1.8	0.5	1.31037	0.111111	0.426905	15.6	0.027	0.0848016	0.00839981	0.385055	-0.0980326	0.00961039	0.00200786	0.581606	0.362376	0.131316	0.0180357	0.271486	-0.36406	0.13254	0.0386452	0.228054	-0.465798	0.216967	0.0741441	0.293442	-0.312629	0.0977371	0.0265068

## Sheet: Critical suspension
	Flow rate （m³/h）	Depth（cm）	Velocity （m/s）	Shape	Size（mm）			CSF	ESD（mm）	（ESD*g*（ρs-ρ0）/ρ0）^0.5	ds/h	Settling distance （cm）	Settling time（s）	Settling velocity （cm/s）	Lateral displacement（cm）	Lateral velocity（m/s）	Sedimentation phenomenon
					A	B	C
PS1050	108	32	0.234375	columnar	3.3	2.2	1.9	0.261708	2.39826	0.0342804	0.00749457	25	4.6		100	0.217391	float
	108	32	0.234375	columnar	2.8	2.4	2	0.297619	2.37757	0.0341322	0.0074299	25	8.09		200	0.247219	suspension
	108	32	0.234375	columnar	3	2.2	1.8	0.272727	2.28177	0.0334375	0.00713054	25	8.85		205	0.231638	suspension
	108	32	0.234375	columnar	2.9	2.6	1.9	0.251989	2.42871	0.0344973	0.00758971	25	8.92	2.80269	160	0.179372
	108	32	0.234375	columnar	3.3	2.8	2.3	0.248918	2.76992	0.036841	0.00865599	25	7.79		200	0.256739	suspension
	108	32	0.234375	columnar	2.9	2.6	2	0.265252	2.47059	0.0347935	0.00772059	25	7.67		200	0.260756	suspension
	108	32	0.234375	columnar	3	2.8	2.3	0.27381	2.6833	0.0362604	0.00838531	25	4.04		100	0.247525	suspension
	108	32	0.234375	columnar	2.9	2.8	2.2	0.270936	2.61412	0.03579	0.00816914	25	7.67	3.25945	230	0.29987
	108	32	0.234375	columnar	3.1	1.8	1.8	0.322581	2.15759	0.0325149	0.00674247	25	10.17	2.45821	300	0.294985
	108	32	0.234375	columnar	3	2.5	2	0.266667	2.46621	0.0347627	0.00770691	25	9.04	2.76549	230	0.254425
	108	32	0.234375	particle	2.5	1	1	0.4	1.35721	0.0257882	0.00424128	25	9.92	2.52016	238	0.239919
	108	32	0.234375	particle	2.7	1.1	0.7	0.23569	1.2763	0.0250077	0.00398843	25	7.42		200	0.269542	suspension
	108	32	0.234375	particle	2.9	0.8	0.7	0.301724	1.17543	0.0239991	0.00367321	25	9.85	2.53807	170	0.172589
	108	32	0.234375	particle	2	1.1	0.8	0.363636	1.20736	0.024323	0.00377301	25	9.85		210	0.213198	suspension
	112	32	0.243056	particle	2.5	1.1	0.8	0.290909	1.30059	0.0252446	0.00406435	25	3.81		100	0.262467	suspension
	112	32	0.243056	particle	1.9	1.4	0.4	0.150376	1.02089	0.022366	0.00319029	25	7.14		200	0.280112	suspension
	112	32	0.243056	particle	1.5	1.2	0.8	0.444444	1.12924	0.023523	0.00352889	25	8.54		220	0.257611	suspension
	112	32	0.243056	particle	2	1	1	0.5	1.25992	0.0248468	0.00393725	25	11.54		300	0.259965	suspension
	112	32	0.243056	particle	2.5	1.5	0.5	0.133333	1.23311	0.0245809	0.00385346	25	8.28		210	0.253623	suspension
	112	32	0.243056	particle	2	1.6	1.3	0.40625	1.60829	0.0280724	0.00502591	25	9.54	2.62055	234	0.245283
	112	32	0.243056	particle	2.1	1.2	1.1	0.436508	1.40475	0.026236	0.00438983	25	7.6		200	0.263158	suspension
	112	32	0.243056	particle	2.3	1.1	1	0.395257	1.36262	0.0258395	0.00425818	25	10.42	2.39923	330	0.316699
	112	32	0.243056	particle	1.7	1.2	1.2	0.588235	1.34773	0.025698	0.00421167	25	11.54	2.16638	300	0.259965
	112	32	0.243056	particle	1.3	1	0.7	0.538462	0.969052	0.0217907	0.00302829	25	16.6		370	0.222892	suspension
	112	32	0.243056	particle	1.2	1.1	0.9	0.681818	1.0591	0.0227807	0.0033097	25	14.6	1.71233	243	0.166438
	112	32	0.243056	particle	1.5	1.1	1	0.606061	1.18167	0.0240628	0.00369271	25	3.92		100	0.255102	float
	112	32	0.243056	particle	1.7	1.2	0.4	0.196078	0.934466	0.0213983	0.00292021	25	10.56	2.36742	200	0.189394
	112	32	0.243056	particle	1.9	1.4	0.6	0.225564	1.16863	0.0239297	0.00365197	25	13.68	1.82749	336	0.245614
	105	30	0.243056	particle	1.5	1.2	1	0.555556	1.21644	0.0244143	0.0040548	25	11.17		300	0.268577	suspension
	72	20	0.25	particle	1.7	1.6	1.3	0.477941	1.52348	0.0273223	0.00761741	15	6.23		200	0.321027	suspension
	72	20	0.25	shard	3.2	2.2	0.8	0.113636	1.77918	0.0295263	0.00889592	15	4.42	3.39367	290	0.656109
	72	20	0.25	shard	2.5	2	0.8	0.16	1.5874	0.0278895	0.00793701	15	5.17	2.90135	340	0.65764
	72	20	0.25	shard	3.2	2.5	0.8	0.1	1.85664	0.0301621	0.00928318	15	4.4	3.40909	130	0.295455
	72	20	0.25	shard	3.4	2.3	0.8	0.102302	1.84261	0.0300479	0.00921303	15	4.15	3.61446	120	0.289157
	72	20	0.25	shard	2.1	1.3	0.8	0.29304	1.29743	0.0252139	0.00648715	15	4.92	3.04878	148	0.300813
	72	20	0.25	shard	1.7	1.5	0.8	0.313725	1.26827	0.0249289	0.00634133	15	9.6		300	0.3125	suspension
	72	20	0.25	shard	2.5	2.3	0.8	0.13913	1.6631	0.0285468	0.00831552	15	5.6	2.67857	80	0.142857
	72	20	0.25	shard	3	2.1	0.8	0.126984	1.71452	0.0289848	0.00857262	15	6.99		200	0.286123	float
	72	20	0.25	shard	2.5	2.4	0.8	0.133333	1.68687	0.02875	0.00843433	15	6.04		200	0.331126	suspension
	72	20	0.25	shard	2.5	2	0.8	0.16	1.5874	0.0278895	0.00793701	15	5.67	2.6455	170	0.299824
	72	20	0.25	shard	2.6	1.7	0.8	0.180995	1.52348	0.0273223	0.00761741	15	5.5	2.72727	150	0.272727
	72	20	0.25	shard	2.8	2.1	0.8	0.136054	1.67554	0.0286534	0.00837772	15	3.81	3.93701	100	0.262467
	72	20	0.25	shard	2.3	1.7	0.8	0.204604	1.46248	0.0267696	0.00731238	15	4.48	3.34821	160	0.357143
	72	20	0.25	shard	2.9	1.2	0.8	0.229885	1.40677	0.0262549	0.00703385	15	7.17		230	0.320781	suspension
	72	20	0.25	shard	2.9	1.3	0.8	0.212202	1.44481	0.0266075	0.00722405	15	6.17	2.43112	168	0.272285
	72	20	0.25	shard	3	1.5	0.8	0.177778	1.53262	0.0274041	0.00766309	15	6.6		200	0.30303	suspension
	72	20	0.25	shard	3	2	0.8	0.133333	1.68687	0.02875	0.00843433	15	9.6		300	0.3125	suspension
	72	20	0.25	shard	2.7	1.2	0.8	0.246914	1.37366	0.025944	0.00686829	15	6.35		210	0.330709	suspension
	72	20	0.25	shard	2.5	1.5	0.8	0.213333	1.44225	0.0265839	0.00721125	15	560		180	0.00321429	suspension
	72	20	0.25	shard	2	1.2	0.8	0.333333	1.24289	0.0246783	0.00621447	15	8.04	1.86567	240	0.298507
PA1140	177	20.5	0.599593	columnar	3.4	2.6	2.3	0.260181	2.72936	0.0611938	0.0133139	15	2.11	7.109	180	0.853081
	177	20.5	0.599593	columnar	3.2	2.8	2.2	0.245536	2.70133	0.0608787	0.0131772	15	2.15	6.97674	180	0.837209
	177	20.5	0.599593	columnar	3.1	2.5	2.2	0.283871	2.5738	0.0594244	0.0125551	15	2.15	6.97674	165	0.767442
	177	20.5	0.599593	columnar	3.5	2.4	2.4	0.285714	2.72164	0.0611072	0.0132763	15	2.23	6.72646	160	0.717489
	177	20.5	0.599593	columnar	3.1	2.5	2.3	0.296774	2.61222	0.0598662	0.0127425	15	2.42	6.19835	167	0.690083
	177	20.5	0.599593	columnar	3	2.6	2.5	0.320513	2.69161	0.0607691	0.0131298	15	2.1	7.14286	144	0.685714
	177	20.5	0.599593	columnar	3.7	2.3	2.2	0.258519	2.65532	0.0603581	0.0129528	15	2.15	6.97674	180	0.837209
	177	20.5	0.599593	columnar	3.3	2.4	2.3	0.290404	2.63118	0.0600831	0.012835	15	2.54	5.90551	165	0.649606
	177	20.5	0.599593	columnar	3.4	2.2	2.1	0.280749	2.50442	0.0586179	0.0122167	15	2.35	6.38298	116	0.493617
	177	20.5	0.599593	columnar	3.1	2	1.9	0.306452	2.27535	0.0558729	0.0110993	15	2.6	5.76923	158	0.607692
	177	20.5	0.599593	particle	3.1	2.5	1.3	0.167742	2.15981	0.0544358	0.0105356	15	4.29		300	0.699301	suspension
	177	20.5	0.599593	particle	3	2.2	1.6	0.242424	2.19392	0.054864	0.0107021	15	2.35	6.38298	146	0.621277
	177	20.5	0.599593	particle	3	2	1.5	0.25	2.08008	0.0534217	0.0101468	15	4	3.75	310	0.775
	177	20.5	0.599593	particle	2.4	2.2	1.9	0.359848	2.15673	0.054397	0.0105206	15	3.28	4.57317	200	0.609756
	177	20.5	0.599593	particle	3	2.2	1.5	0.227273	2.14723	0.0542771	0.0104743	15	4.29		300	0.699301	float
	177	20.5	0.599593	particle	3.1	1.6	1.1	0.221774	1.76045	0.0491461	0.00858758	15	2.6		200	0.769231	float
	177	20.5	0.599593	particle	2.2	2	1.6	0.363636	1.91657	0.051279	0.00934911	15	3.4	4.41176	147	0.432353
	177	20.5	0.599593	particle	3	2.5	1.8	0.24	2.3811	0.0571566	0.0116151	15	2.9	5.17241	310	1.06897
	177	20.5	0.599593	particle	2.5	2	1.8	0.36	2.08008	0.0534217	0.0101468	15	2.23	6.72646	166	0.744395
	177	20.5	0.599593	particle	2.4	2	1.3	0.270833	1.84103	0.0502583	0.00898065	15	3.54	4.23729	229	0.646893
	177	20.5	0.599593	particle	2.4	2.3	1.8	0.326087	2.14983	0.0543099	0.010487	15	3.79	3.95778	262	0.691293
	177	20.5	0.599593	particle	2.2	1.9	1.6	0.382775	1.88408	0.0508424	0.00919062	15	3.45	4.34783	213	0.617391
	177	20.5	0.599593	particle	2.2	2.1	1.5	0.324675	1.90653	0.0511445	0.00930016	15	3.48	4.31034	235	0.675287
	177	20.5	0.599593	particle	2.2	2	1.7	0.386364	1.95569	0.0517997	0.00953996	15	4.85	3.09278	321	0.661856
	177	20.5	0.599593	particle	2.6	1.8	1.4	0.299145	1.87122	0.0506687	0.0091279	15	3.2	4.6875	155	0.484375
	177	20.5	0.599593	particle	1.9	1.9	1.2	0.33241	1.63016	0.0472924	0.00795199	15	4.1	3.65854	260	0.634146
	177	20.5	0.599593	particle	2.8	2	1.3	0.232143	1.9381	0.0515663	0.00945417	15	2.98	5.03356	179	0.600671
	177	20.5	0.599593	particle	2.4	1.6	1.1	0.286458	1.6165	0.0470939	0.00788535	15	4.29	3.4965	274	0.638695
	177	20.5	0.599593	particle	2	2	1.4	0.35	1.77581	0.04936	0.00866248	15	5.85		390	0.666667	suspension
	177	20.5	0.599593	particle	2.2	1.5	1.2	0.363636	1.58209	0.04659	0.00771752	15	4.17		300	0.719424	suspension
	177	20.5	0.599593	shard	3.9	1.9	1	0.134953	1.94957	0.0517186	0.00951011	15	4.17	3.59712	245	0.58753
	177	20.5	0.599593	shard	2.8	2	1	0.178571	1.77581	0.04936	0.00866248	15	2.92	5.13699	178	0.609589
	177	20.5	0.599593	shard	2.8	1.7	1	0.210084	1.68217	0.0480409	0.00820569	15	4.23		300	0.70922	suspension
	177	20.5	0.599593	shard	3	2.5	1	0.133333	1.95743	0.0518228	0.00954846	15	4.92	3.04878	320	0.650407
	177	20.5	0.599593	shard	2.6	1.3	1	0.295858	1.50074	0.0453764	0.00732068	15	3.92		300	0.765306	suspension
	177	20.5	0.599593	shard	3.1	3	1	0.107527	2.10294	0.0537144	0.0102583	15	2.78		200	0.719424	float
	177	20.5	0.599593	shard	3.1	2	1	0.16129	1.83709	0.0502045	0.00896142	15	4.6	3.26087	320	0.695652
	177	20.5	0.599593	shard	3.1	1.8	1	0.179211	1.77369	0.0493306	0.00865215	15	4.07		300	0.737101	suspension
	177	20.5	0.599593	shard	2.2	2	1	0.227273	1.63864	0.0474154	0.00799338	15	3.23	4.64396	260	0.804954
	177	20.5	0.599593	shard	2.7	1.6	1	0.231481	1.62865	0.0472706	0.00794464	15	4.6	3.26087	290	0.630435
	177	20.5	0.599593	shard	2.8	1.6	1	0.223214	1.64851	0.047558	0.00804153	15	2.98		200	0.671141	float
	177	20.5	0.599593	shard	2	1.9	1	0.263158	1.56049	0.0462709	0.00761215	15	5.73	2.6178	345	0.602094
	177	20.5	0.599593	shard	1.9	1.2	1	0.438596	1.31617	0.0424945	0.00642034	15	4.35		300	0.689655	suspension
	177	20.5	0.599593	shard	2.2	1.7	1	0.26738	1.55223	0.0461483	0.00757187	15	2.87	5.22648	110	0.383275
	177	20.5	0.599593	shard	2.8	1.4	1	0.255102	1.57675	0.0465113	0.00769145	15	2.25	6.66667	178	0.791111
	177	20.5	0.599593	shard	2.6	1.5	1	0.25641	1.57406	0.0464716	0.00767835	15	2.54		200	0.787402	suspension
	177	20.5	0.599593	shard	1.5	1.4	1	0.47619	1.28058	0.041916	0.00624673	15	2.9	5.17241	145	0.5
	177	20.5	0.599593	shard	2.1	1.4	1	0.340136	1.43257	0.0443338	0.00698815	15	4.03		300	0.744417	suspension
	177	20.5	0.599593	shard	2.3	1.3	1	0.334448	1.44065	0.0444586	0.00702754	15	3.79	3.95778	278	0.733509
	177	20.5	0.599593	shard	2.2	1.8	1	0.252525	1.58209	0.04659	0.00771752	15	3.09	4.85437	210	0.679612
	177	20.5	0.599593	shard	3.4	2.7	0.5	0.0544662	1.6619	0.0477506	0.00810682	15	3.99	3.7594	270	0.676692
	177	20.5	0.599593	shard	2.8	2.6	0.5	0.0686813	1.53827	0.0459403	0.00750378	15	4.04	3.71287	270	0.668317
	177	20.5	0.599593	shard	2.6	2.5	0.5	0.0769231	1.48125	0.0450807	0.0072256	15	3.42	4.38596	246	0.719298
	177	20.5	0.599593	shard	2.9	2.2	0.5	0.0783699	1.47208	0.0449409	0.00718086	15	3.67	4.08719	235	0.640327
	177	20.5	0.599593	shard	3	2.6	0.5	0.0641026	1.57406	0.0464716	0.00767835	15	3.98		300	0.753769	suspension
	177	20.5	0.599593	shard	3	2.1	0.5	0.0793651	1.4659	0.0448465	0.00715072	15	2.67	5.61798	198	0.741573
	177	20.5	0.599593	shard	2.7	2.1	0.5	0.0881834	1.41531	0.0440659	0.00690394	15	3.78	3.96825	156	0.412698
	177	20.5	0.599593	shard	2.8	2.1	0.5	0.085034	1.43257	0.0443338	0.00698815	15	2.93	5.11945	130	0.443686
	177	20.5	0.599593	shard	2.3	2.2	0.5	0.0988142	1.36262	0.0432378	0.00664691	15	2.93	5.11945	128	0.43686
	177	20.5	0.599593	shard	2.2	1.8	0.5	0.126263	1.25571	0.041507	0.0061254	15	3.42		210	0.614035	suspension
	177	20.5	0.599593	shard	2.7	2	0.5	0.0925926	1.39248	0.043709	0.00679257	15	2.62	5.72519	200	0.763359
	177	20.5	0.599593	shard	2	1.6	0.5	0.15625	1.16961	0.0400587	0.0057054	15	2.98		200	0.671141	suspension
	177	20.5	0.599593	shard	3	1.3	0.5	0.128205	1.24933	0.0414015	0.00609431	15	2.75		200	0.727273	suspension
	177	20.5	0.599593	shard	2.4	1.9	0.5	0.109649	1.31617	0.0424945	0.00642034	15	2.92	5.13699	150	0.513699
	177	20.5	0.599593	shard	2.4	1.5	0.5	0.138889	1.21644	0.0408529	0.00593386	15	3.17	4.73186	243	0.766562
	177	20.5	0.599593	shard	2.2	0.8	0.5	0.284091	0.958284	0.0362597	0.00467456	15	2.81		200	0.711744	float
	177	20.5	0.599593	shard	2.6	1.1	0.5	0.174825	1.12662	0.0393157	0.00549572	15	2.6	5.76923	160	0.615385
	177	20.5	0.599593	shard	2.4	2.1	0.5	0.0992063	1.36082	0.0432093	0.00663814	15	4.23	3.5461	300	0.70922
	177	20.5	0.599593	shard	2.6	2.3	0.5	0.083612	1.44065	0.0444586	0.00702754	15	4.17	3.59712	300	0.719424
	177	20.5	0.599593	shard	2.3	1.6	0.5	0.13587	1.22539	0.0410028	0.00597749	15	3.23	4.64396	240	0.743034
	207	20	0.71875	columnar	3.1	2.8	2.3	0.264977	2.71279	0.0610077	0.0135639	15	3.43		300	0.874636	suspension
	207	20	0.71875	columnar	3.3	2.2	2.2	0.30303	2.51837	0.058781	0.0125919	15	3.54		300	0.847458	suspension
	207	20	0.71875	columnar	3.2	2.5	2.2	0.275	2.60118	0.0597396	0.0130059	15	2.18	6.88073	246	1.12844
	207	20	0.71875	columnar	3.1	2.2	2	0.293255	2.3893	0.0572549	0.0119465	15	3.75		300	0.8	suspension
	207	20	0.71875	columnar	3	2	2	0.333333	2.28943	0.0560455	0.0114471	15	2.29	6.55022	360	1.57205
	207	20	0.71875	columnar	3.2	2	1.9	0.296875	2.29956	0.0561693	0.0114978	15	2.35		320	1.3617	suspension
	207	20	0.71875	columnar	3.2	2.3	2.3	0.3125	2.56765	0.0593533	0.0128382	15	1.95	7.69231	130	0.666667
	207	20	0.71875	columnar	3.1	2.5	2.2	0.283871	2.5738	0.0594244	0.012869	15	2.04	7.35294	230	1.12745
	207	20	0.71875	columnar	3	1.8	1.8	0.333333	2.13414	0.0541113	0.0106707	15	2.34	6.41026	270	1.15385
	207	20	0.71875	columnar	3	1.3	1.3	0.333333	1.71792	0.0485488	0.00858959	15	2.6	5.76923	250	0.961538
	207	20	0.71875	particle	3.6	3	2	0.185185	2.78495	0.0618139	0.0139248	15	2.17	6.91244	240	1.10599
	207	20	0.71875	particle	3	2.2	1.2	0.181818	1.99331	0.0522955	0.00996655	15	2.56		230	0.898438	suspension
	207	20	0.71875	particle	3.3	2.4	2	0.252525	2.51141	0.0586998	0.0125571	15	2.54		270	1.06299	suspension
	207	20	0.71875	particle	3.2	2.2	2	0.284091	2.41472	0.0575587	0.0120736	15	2.6	5.76923	250	0.961538
	207	20	0.71875	particle	3.4	2	2	0.294118	2.38697	0.0572269	0.0119348	15	2.23	6.72646	290	1.30045
	207	20	0.71875	particle	2.8	2.4	2	0.297619	2.37757	0.0571141	0.0118878	15	3.42		300	0.877193	suspension
	207	20	0.71875	particle	3.3	3	2.1	0.212121	2.7497	0.0614214	0.0137485	15	2.35	6.38298	225	0.957447
	207	20	0.71875	particle	3.1	2.2	1.3	0.190616	2.06971	0.0532883	0.0103485	15	2.67	5.61798	260	0.973783
	207	20	0.71875	particle	3.7	2.5	1.8	0.194595	2.55351	0.0591897	0.0127676	15	3.23		300	0.928793	suspension
	207	20	0.71875	particle	3.6	1.9	1.5	0.219298	2.17295	0.0546011	0.0108647	15	2.32	6.46552	240	1.03448
	207	20	0.71875	particle	3	2.4	1.3	0.180556	2.10746	0.053772	0.0105373	15	2.06		200	0.970874	float
	207	20	0.71875	particle	3	2.4	1.9	0.263889	2.39164	0.0572829	0.0119582	15	2.1	7.14286	200	0.952381
	207	20	0.71875	particle	2.8	2.4	1.6	0.238095	2.20714	0.055029	0.0110357	15	1.9		200	1.05263	suspension
	207	20	0.71875	particle	2.4	2.3	1.8	0.326087	2.14983	0.0543099	0.0107491	15	2.18	6.88073	200	0.917431	suspension
	207	20	0.71875	particle	3	1.6	1.2	0.25	1.79256	0.0495923	0.00896281	15	2.56	5.85938	230	0.898438
	207	20	0.71875	particle	3.9	2	1.7	0.217949	2.36691	0.0569859	0.0118345	15	1		100	1	suspension
	207	20	0.71875	particle	2.3	2	1.7	0.369565	1.98489	0.0521849	0.00992443	15	2		150	0.75	suspension
	207	20	0.71875	particle	3.1	1.4	0.9	0.207373	1.57487	0.0464835	0.00787434	15	2.15		200	0.930233	suspension
	207	20	0.71875	particle	3	2.8	1.1	0.130952	2.09841	0.0536565	0.0104921	15	2.1		200	0.952381	float
	207	20	0.71875	particle	3.3	1.9	1.8	0.287081	2.24309	0.0554754	0.0112154	15	2.18		200	0.917431	suspension
	207	20	0.71875	shard	3.5	2.8	1	0.102041	2.13997	0.0541853	0.0106999	15	2.1	7.14286	200	0.952381
	207	20	0.71875	shard	3.2	2.2	1	0.142045	1.91657	0.051279	0.00958284	15	1.98	7.57576	189	0.954545
	207	20	0.71875	shard	3	2.1	1	0.15873	1.84691	0.0503385	0.00923457	15	2.81	5.33808	176	0.626335
	207	20	0.71875	shard	2.9	2.2	1	0.15674	1.8547	0.0504445	0.0092735	15	2.28		200	0.877193	suspension
	207	20	0.71875	shard	2.6	2	1	0.192308	1.73248	0.0487541	0.00866239	15	1.85		176	0.951351	suspension
	207	20	0.71875	shard	2.9	2.1	1	0.164204	1.82616	0.0500549	0.00913081	15	2.28		200	0.877193	suspension
	207	20	0.71875	shard	2.9	2.2	1	0.15674	1.8547	0.0504445	0.0092735	15	2.1		200	0.952381	suspension
	207	20	0.71875	shard	4.1	2.2	1	0.110865	2.08162	0.0534414	0.0104081	15	1.96	7.65306	160	0.816327
	207	20	0.71875	shard	2.2	2	1	0.227273	1.63864	0.0474154	0.00819321	15	1.87		200	1.06952	float
	207	20	0.71875	shard	2.8	2	1	0.178571	1.77581	0.04936	0.00887904	15	2.04		200	0.980392	suspension
	207	20	0.71875	shard	3	1.4	1	0.238095	1.61343	0.0470492	0.00806714	15	2.06		200	0.970874	suspension
	207	20	0.71875	shard	2.5	2.1	1	0.190476	1.73801	0.0488319	0.00869007	15	2.93	5.11945	190	0.648464
	207	20	0.71875	shard	1.9	1.8	1	0.292398	1.50664	0.0454654	0.00753319	15	2.1		200	0.952381	suspension
	207	20	0.71875	shard	2.1	1.9	1	0.250627	1.58608	0.0466487	0.00793039	15	3.62	4.14365	150	0.414365
	207	20	0.71875	shard	2.1	1.8	1	0.26455	1.55775	0.0462302	0.00778874	15	2.57		150	0.583658	suspension
	207	20	0.71875	shard	3	1.5	1	0.222222	1.65096	0.0475933	0.00825482	15	2.98	5.03356	170	0.57047
	207	20	0.71875	shard	2.1	2	1	0.238095	1.61343	0.0470492	0.00806714	15	2.78	5.39568	160	0.57554
	207	20	0.71875	shard	3	1.1	1	0.30303	1.48881	0.0451956	0.00744403	15	2.1		200	0.952381	suspension
	207	20	0.71875	shard	2.1	1.3	1	0.3663	1.39761	0.0437896	0.00698807	15	2.56	5.85938	230	0.898438
	207	20	0.71875	shard	2.3	2	1	0.217391	1.6631	0.047768	0.00831552	15	2.81	5.33808	170	0.604982
	207	20	0.71875	shard	3.5	2.9	0.5	0.0492611	1.71848	0.0485568	0.00859242	15	1.23		100	0.813008	suspension
	207	20	0.71875	shard	3.7	2.1	0.5	0.0643501	1.57204	0.0464418	0.0078602	15	1.57		100	0.636943	suspension
	207	20	0.71875	shard	3	2.7	0.5	0.0617284	1.59399	0.0467649	0.00796994	15	1.92		200	1.04167	suspension
	207	20	0.71875	shard	2.8	1.8	0.5	0.0992063	1.36082	0.0432093	0.00680409	15	2		200	1	suspension
	207	20	0.71875	shard	2.8	2.2	0.5	0.0811688	1.45496	0.0446789	0.00727479	15	2.29		200	0.873362	suspension
	207	20	0.71875	shard	3.7	2.1	0.5	0.0643501	1.57204	0.0464418	0.0078602	15	1.92		200	1.04167	suspension
	207	20	0.71875	shard	3.5	2.9	0.5	0.0492611	1.71848	0.0485568	0.00859242	15	1		100	1	suspension
	207	20	0.71875	shard	3.1	2.4	0.5	0.0672043	1.54946	0.0461071	0.00774731	15	2.04		200	0.980392	suspension
	207	20	0.71875	shard	3	3	0.5	0.0555556	1.65096	0.0475933	0.00825482	15	2.35		230	0.978723	suspension
	207	20	0.71875	shard	3	2.8	0.5	0.0595238	1.61343	0.0470492	0.00806714	15	2.13	7.04225	210	0.985915
	207	20	0.71875	shard	4	1.3	0.5	0.0961538	1.37507	0.0434349	0.00687534	15	2.73	5.49451	250	0.915751
	207	20	0.71875	shard	3.6	2.8	0.5	0.0496032	1.71452	0.0485008	0.00857262	15	2.03		200	0.985222	float
	207	20	0.71875	shard	3.6	2.5	0.5	0.0555556	1.65096	0.0475933	0.00825482	15	2.1		200	0.952381	suspension
	207	20	0.71875	shard	3	1.7	0.5	0.0980392	1.3662	0.0432946	0.00683099	15	2.1		200	0.952381	suspension
	207	20	0.71875	shard	3.6	1.3	0.5	0.106838	1.32761	0.0426789	0.00663807	15	2.23		200	0.896861	suspension
	207	20	0.71875	shard	4	2.1	0.5	0.0595238	1.61343	0.0470492	0.00806714	15	2.45		200	0.816327	suspension
	207	20	0.71875	shard	2.3	2.1	0.5	0.10352	1.34165	0.0429039	0.00670825	15	2.44		200	0.819672	suspension
	207	20	0.71875	shard	3.5	2.1	0.5	0.0680272	1.54319	0.0460136	0.00771594	15	2.31		200	0.865801	suspension
	207	20	0.71875	shard	2.9	1.8	0.5	0.0957854	1.37683	0.0434627	0.00688415	15	2.13		200	0.938967	suspension
	207	20	0.71875	shard	2.6	2	0.5	0.0961538	1.37507	0.0434349	0.00687534	15	2.48		200	0.806452	suspension
PET1390	217	20	0.753472	shard	3.2	2.8	0.3	0.0334821	1.39041	0.0728982	0.00695205	15	3.12		300	0.961538	suspension
	217	20	0.753472	shard	3	2	0.3	0.05	1.21644	0.0681853	0.0060822	15	1.17	12.8205	100	0.854701
	217	20	0.753472	shard	3	3	0.3	0.0333333	1.39248	0.0729524	0.00696238	15	2.59		200	0.772201	suspension
	217	20	0.753472	shard	2.6	2.3	0.3	0.0501672	1.21509	0.0681474	0.00607544	15	2.79		200	0.716846	suspension
	217	20	0.753472	shard	2.9	2.8	0.3	0.0369458	1.34553	0.071712	0.00672764	15	3.17	4.73186	230	0.725552
	217	20	0.753472	shard	3.2	1.9	0.3	0.0493421	1.22182	0.068336	0.00610911	15	2.55		200	0.784314	suspension
	217	20	0.753472	shard	2.8	2	0.3	0.0535714	1.18878	0.0674057	0.00594392	15	1.65		143	0.866667	suspension
	217	20	0.753472	shard	2.7	2.1	0.3	0.0529101	1.19372	0.0675454	0.00596859	15	1.67		150	0.898204	suspension
	217	20	0.753472	shard	2.7	1.5	0.3	0.0740741	1.06707	0.0638618	0.00533534	15	3.81		300	0.787402	suspension
	217	20	0.753472	shard	3.5	2	0.3	0.0428571	1.28058	0.0699598	0.0064029	15	2.73	5.49451	200	0.732601
	217	20	0.753472	shard	2.7	1.7	0.3	0.0653595	1.11253	0.065208	0.00556264	15	2.67	5.61798	186	0.696629
	217	20	0.753472	shard	2.9	1.9	0.3	0.0544465	1.18238	0.067224	0.00591191	15	2.85		200	0.701754	suspension
	217	20	0.753472	shard	2.2	1.7	0.3	0.0802139	1.03912	0.0630199	0.00519558	15	2.71		200	0.738007	suspension
	217	20	0.753472	shard	3.6	1.7	0.3	0.0490196	1.2245	0.0684107	0.00612248	15	2.18	6.88073	160	0.733945
	217	20	0.753472	shard	3	2.2	0.3	0.0454545	1.25571	0.0692771	0.00627854	15	3.54		300	0.847458	suspension
	217	20	0.753472	shard	3	1.8	0.3	0.0555556	1.17446	0.0669984	0.0058723	15	2.35	6.38298	195	0.829787
	217	20	0.753472	shard	2.9	1.8	0.3	0.0574713	1.16126	0.0666209	0.00580631	15	3.1		230	0.741935	suspension
	217	20	0.753472	shard	2.1	1.8	0.3	0.0793651	1.04281	0.0631317	0.00521404	15	3.1	4.83871	227	0.732258
	217	20	0.753472	shard	3	1.5	0.3	0.0666667	1.10521	0.0649932	0.00552605	15	2.92	5.13699	170	0.582192
	217	20	0.753472	shard	2	1.3	0.3	0.115385	0.920516	0.0593145	0.00460258	15	2.68	5.59701	200	0.746269
PVC1390	234	20	0.8125	shard	4	2	0.5	0.0625	1.5874	0.0933363	0.00793701	15	2.1		160	0.761905	suspension
	234	20	0.8125	shard	3	2.8	0.5	0.0595238	1.61343	0.0940983	0.00806714	15	2.12	7.07547	160	0.754717
	234	20	0.8125	shard	3.4	2.2	0.5	0.0668449	1.55223	0.0922966	0.00776117	15	2.92	5.13699	200	0.684932
	234	20	0.8125	shard	2.5	2.4	0.5	0.0833333	1.44225	0.0889667	0.00721125	15	2.46	6.09756	160	0.650407
	234	20	0.8125	shard	2.8	2	0.5	0.0892857	1.40946	0.0879495	0.0070473	15	2.5		200	0.8	suspension
	234	20	0.8125	shard	3	1.7	0.5	0.0980392	1.3662	0.0865892	0.00683099	15	1.42	10.5634	110	0.774648
	234	20	0.8125	shard	3.2	1.5	0.5	0.104167	1.33887	0.0857187	0.00669433	15	2.18	6.88073	150	0.688073
	234	20	0.8125	shard	2.7	2	0.5	0.0925926	1.39248	0.087418	0.00696238	15	2.21		145	0.656109	suspension
	234	20	0.8125	shard	3	1.9	0.5	0.0877193	1.4178	0.0882093	0.007089	15	1.67	8.98204	116	0.694611
	234	20	0.8125	shard	3	2.9	0.5	0.0574713	1.63241	0.0946503	0.00816206	15	1.54	9.74026	100	0.649351
	234	20	0.8125	shard	2.3	2	0.5	0.108696	1.32001	0.0851128	0.00660003	15	3.1	4.83871	230	0.741935
	234	20	0.8125	shard	3	1.6	0.5	0.104167	1.33887	0.0857187	0.00669433	15	3.37	4.45104	250	0.74184
	234	20	0.8125	shard	2	1.8	0.5	0.138889	1.21644	0.0817057	0.0060822	15	2.85		200	0.701754	suspension
	234	20	0.8125	shard	2	2	0.5	0.125	1.25992	0.0831532	0.00629961	15	2.48		200	0.806452	suspension
	234	20	0.8125	shard	2	2	0.5	0.125	1.25992	0.0831532	0.00629961	15	2.09		150	0.717703	suspension
	234	20	0.8125	shard	2.2	1.7	0.5	0.13369	1.23201	0.0822269	0.00616004	15	1.67	8.98204	90	0.538922
	234	20	0.8125	shard	2.2	2.1	0.5	0.108225	1.32192	0.0851744	0.00660958	15	2.31		160	0.692641	suspension
	234	20	0.8125	shard	2.3	1.1	0.5	0.197628	1.08151	0.077041	0.00540755	15	1.54		120	0.779221	suspension
	234	20	0.8125	shard	2.1	1.6	0.5	0.14881	1.18878	0.0807716	0.00594392	15	2.4		157	0.654167	suspension
